# Supplementary material for: Measurement report: Ammonia in Paris derived from ground-based open-path and satellite observations
Source: Copernicus journal article supplement (doi:10.5194/egusphere-2023-963), 2023-05-26
Supplement: Supplementary file 1 [file egusphere-2023-963-supplement.pdf]

1 **Annex S1: atmospheric temperature and PBLH (Planetary Boundary Layer Height) plot on IASI and**  
2 **miniDOAS correlations**

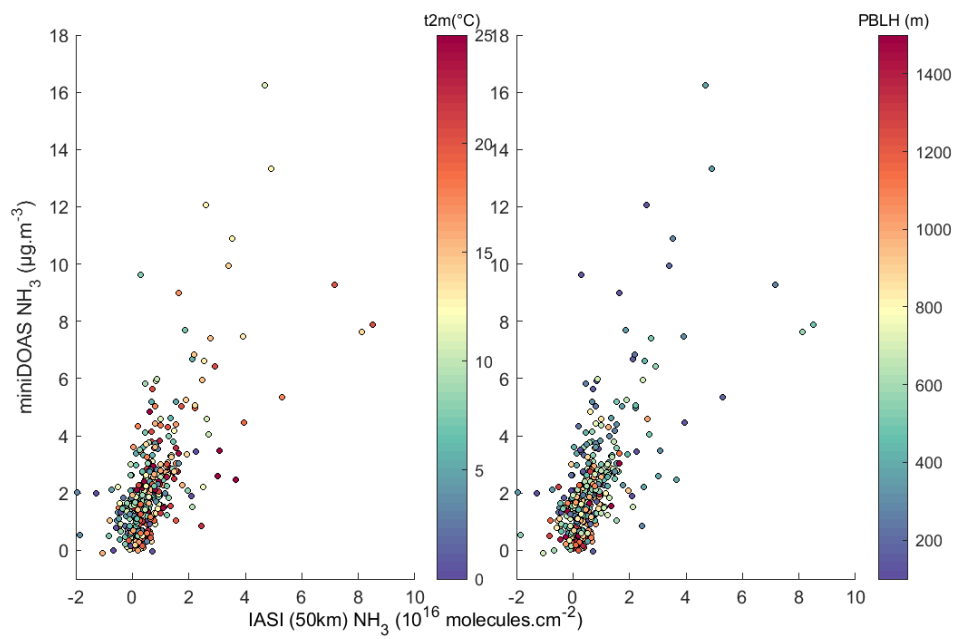

3

4 *Figure S1: miniDOAS ground-based NH<sub>3</sub> concentrations (μg.m<sup>-3</sup>) versus IASI NH<sub>3</sub> column concentrations*  
5 *(molecules.cm<sup>-2</sup>) measured in a 50km box centered in Paris from January 1<sup>st</sup> 2020 to May 31<sup>st</sup> 2022,*  
6 *color coded by atmospheric temperature at 2 meters (in °C, left panel) and PBLH (in m, right panel).*

7 **Annex S2: influence of meteorological condition on seasonal and monthly NH<sub>3</sub> variabilities**

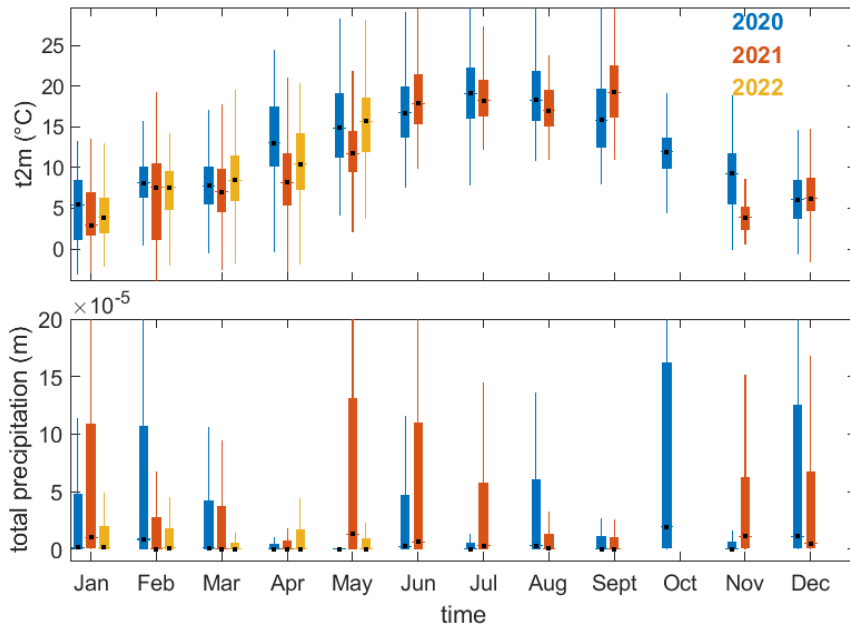

8

9 *Figure S2: Box plot of monthly temperature at 2 meters (t2m, in °C, top panel) and total precipitation*  
10 *(in m, bottom panel) color coded by the year of measurements (2020 in blue, 2021 in orange, and 2022*  
11 *in yellow) derived from ERA-5 around Paris.*

12 **Annex S3: road traffic in Paris**

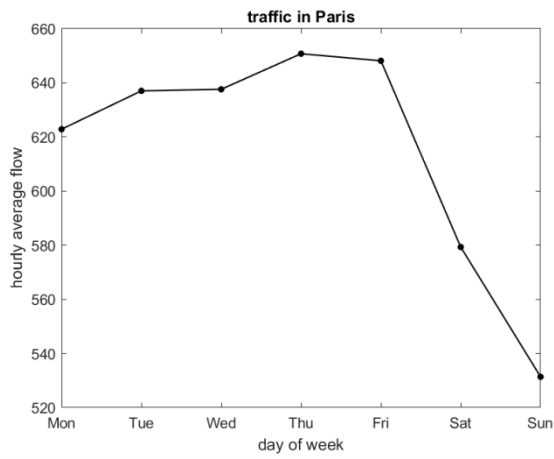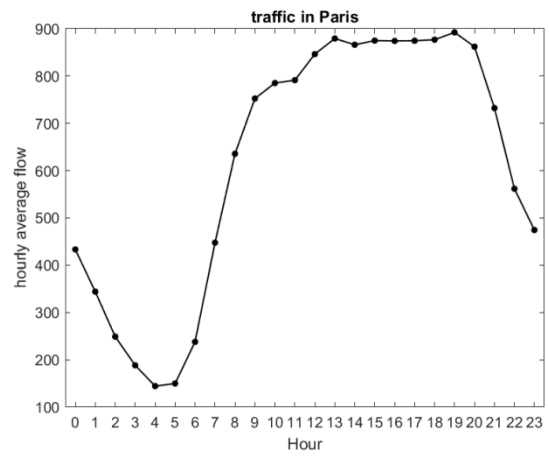

13

14 *Figure S3: weekly (left panel) and diurnal (right panel) cycles of hourly mean flow of vehicles observed*  
15 *in Paris in 2020 and 2021.*

16 **Annex S4: PBLH (Planetary Boundary Layer Height) on surface measurements**

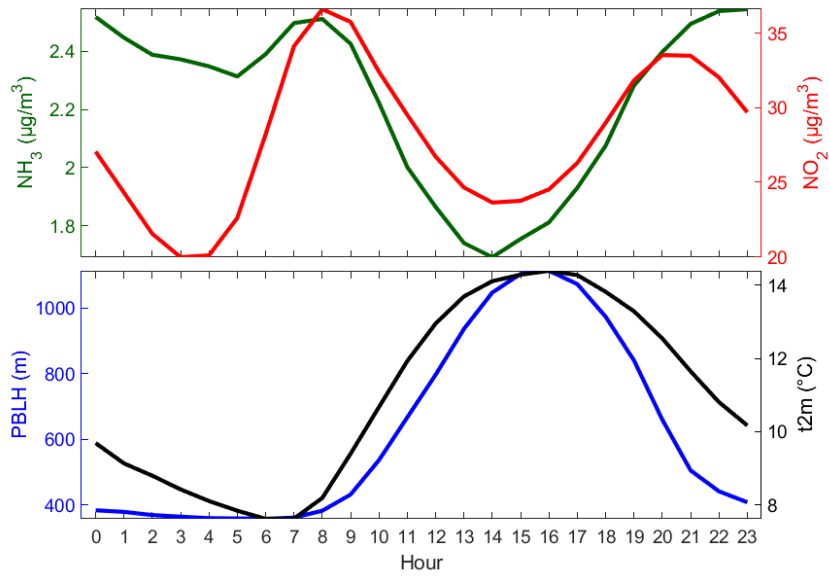

17

18 *Figure S4: mean diurnal cycle of atmospheric  $\text{NH}_3$  and  $\text{NO}_2$  ( $\mu\text{g}\cdot\text{m}^{-3}$ , green and red lines in upper panel)*  
19 *and PBLH (m, in blue, lower panel) and atmospheric temperature ( $^{\circ}\text{C}$ , in black, lower panel) measured*  
20 *in Paris between January 2020 and June 2022.*

21
